# Supplementary material for: Description of Citrobacter cronae sp. nov., isolated from human rectal swabs and stool samples
Source: PubMed Central journal article supplement — Int J Syst Evol Microbiol. 2020 Apr 24;70(5):2998–3003. doi: 10.1099/ijsem.0.004100 (PMC7395625; doi:10.1099/ijsem.0.004100), 2020-04-24
Supplement: ijsem-70-2998-s001.pdf [file ijsem-70-2998-s001.pdf]

## Taxonomic Description template

### 1 Supplementary Figures and Tables

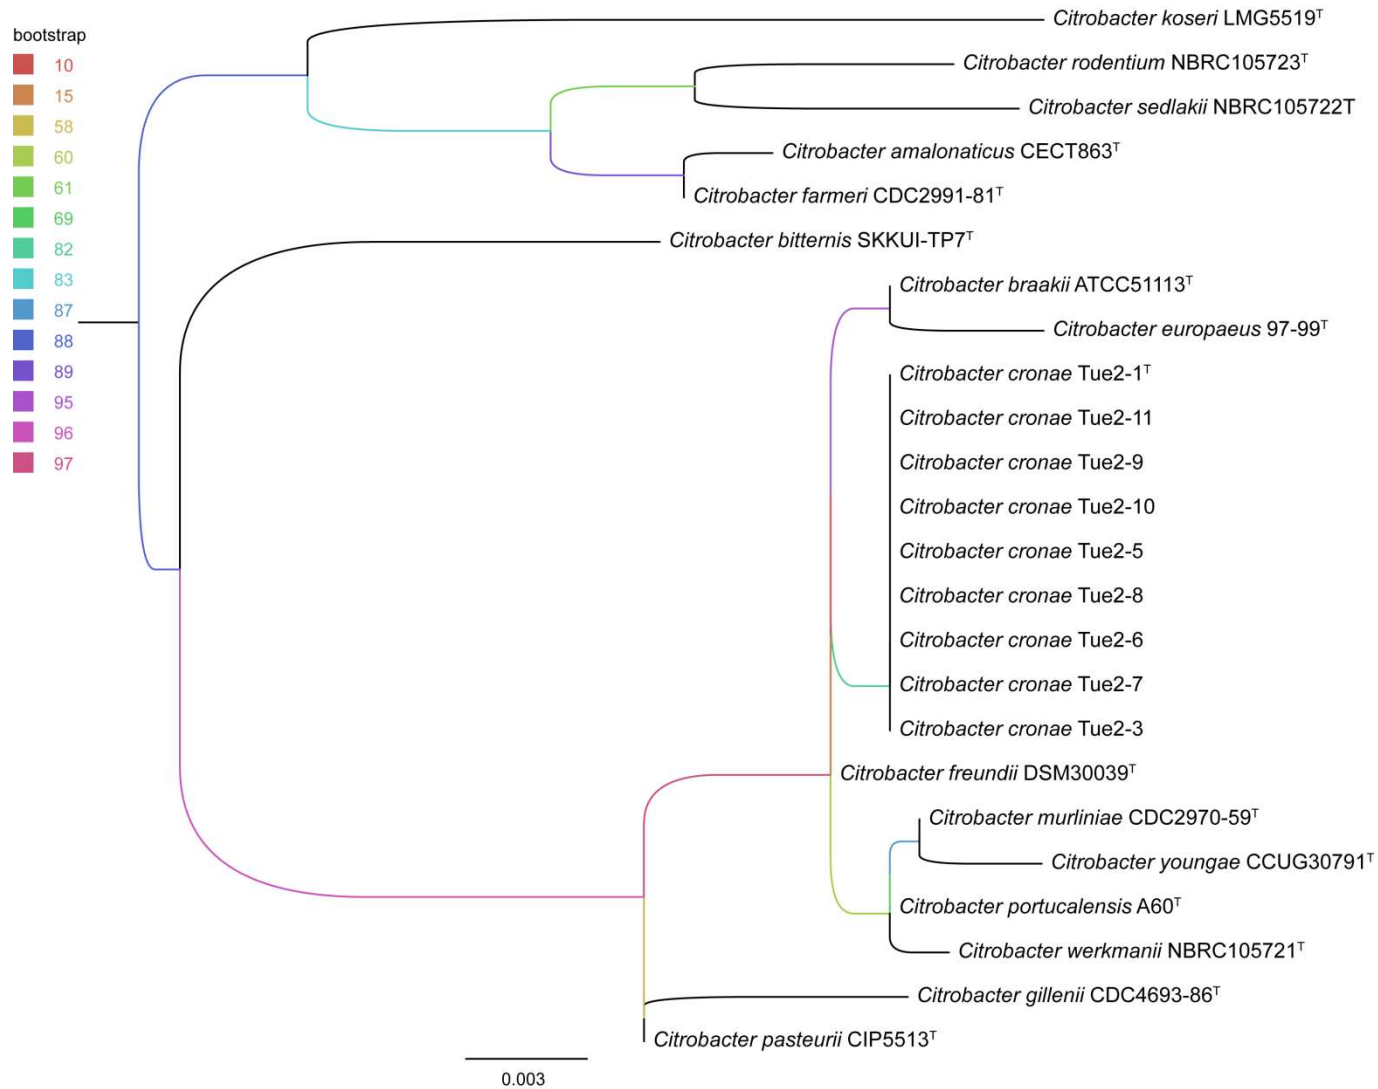

3 **Supplementary Figure S1: Phylogenetic tree based on 16S rRNA sequences.** Calculation of phylogenetic relationship was performed with  
4 1000 bootstrap replicates and the scale bar represents the expected number of changes per site. The tree was rooted at midpoint.

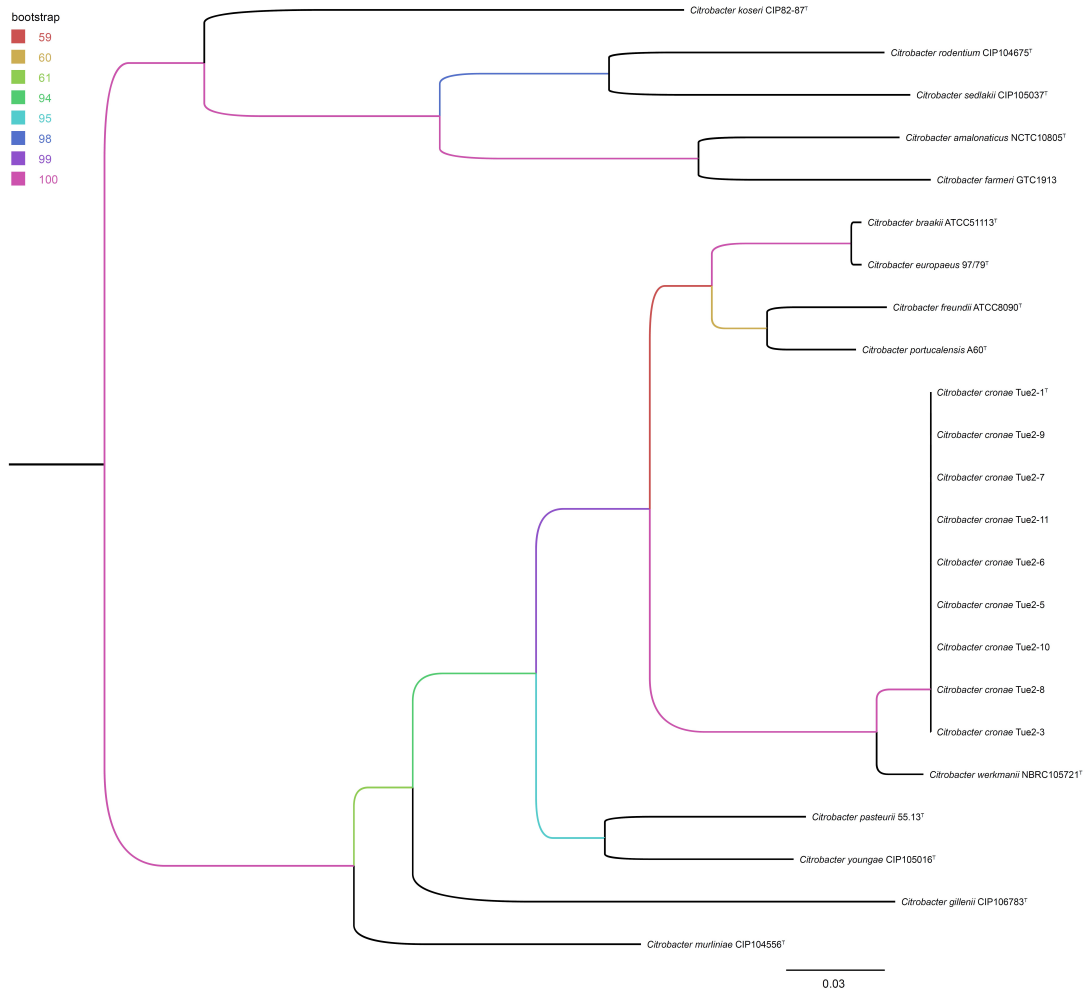

5

6 **Supplementary Figure S2: Maximum-likelihood phylogeny based on *recN* gene.** DNA-sequences of *recN* were extracted from available  
7 WGS data of *Citrobacter* type strains. Phylogeny was conducted using 1000 bootstrap replicates with a scale bar representing the expected  
8 number of changes per site. The tree was rooted at midpoint.

9

10

11

12

13

14

15

16

17

18

19

20

21

22

23 **Supplementary Table S1: Overview of *Citrobacter* species type strains, strain identification and corresponding nucleotide**  
 24 **accession/Gen Bank/ENA numbers of the strains included in the study.**

| <i>Citrobacter</i> species                        | Whole genome sequencing data |                       | 16S rRNA sequence       |                  |
|---------------------------------------------------|------------------------------|-----------------------|-------------------------|------------------|
|                                                   | Strain ID                    | Gen Bank / ENA number | Strain ID               | Accession number |
| <i>Citrobacter amalonaticus</i>                   | NTC10805 <sup>T</sup>        | UFVN01000003.1        | CECT863 <sup>T</sup>    | FR870441         |
| <i>Citrobacter bitternis</i>                      | n/a                          | n/a                   | SKKUI-TP7 <sup>T</sup>  | KJ817168         |
| <i>Citrobacter braakii</i>                        | ATCC51113 <sup>T</sup>       | NZ_NAEW01000001.1     | ATCC51113 <sup>T</sup>  | NAEW01000064     |
| <i>Citrobacter europaeus</i>                      | 97/79 <sup>T</sup>           | NZ_FLYB01000018.1     | 97/79 <sup>T</sup>      | FLYB01000015     |
| <i>Citrobacter farmeri</i>                        | GTC1319                      | NZ_BBMX01000006.1     | CDC2991-81 <sup>T</sup> | AF025371         |
| <i>Citrobacter freundii</i>                       | ATCC8090 <sup>T</sup>        | NZ_JMTA01000001.1     | DSM30039 <sup>T</sup>   | AJ233408         |
| <i>Citrobacter gillenii</i>                       | CIP106783 <sup>T</sup>       | ERS574813             | CDC4693-86 <sup>T</sup> | AF025367         |
| <i>Citrobacter koseri</i>                         | NCTC10786 <sup>T</sup>       | UAVY01000004.1        | LMG5519 <sup>T</sup>    | HQ992945         |
| <i>Citrobacter murlinae</i>                       | CIP104556 <sup>T</sup>       | ERS574814             | CDC2970-59 <sup>T</sup> | AF025369         |
| <i>Citrobacter pasteurii</i>                      | CIP55-13 <sup>T</sup>        | NZ_CDHL01000039.1     | CIP55.13 <sup>T</sup>   | CDHL01000036     |
| <i>Citrobacter portucalensis</i>                  | A60 <sup>T</sup>             | NZ_MV FY01000001.1    | A60 <sup>T</sup>        | MV FY01000035    |
| <i>Citrobacter rodentium</i>                      | NBRC105723 <sup>T</sup>      | NZ_BBNA01000001.1     | NBRC105723 <sup>T</sup> | BBNA01000105     |
| <i>Citrobacter sedlakii</i>                       | NBRC105722 <sup>T</sup>      | NZ_BBNB01000001.1     | NBRC105722 <sup>T</sup> | BBNB01000023     |
| <i>Citrobacter werkmanii</i>                      | NBRC105721 <sup>T</sup>      | NZ_BBMW01000009.1     | NBRC105721 <sup>T</sup> | BBMW01000025     |
| <i>Citrobacter youngae</i>                        | CCUG30791 <sup>T</sup>       | NZ_RPOI01000016.1     | CCUG30791 <sup>T</sup>  | RPOI01000045     |
| <b><i>Citrobacter</i> species from this study</b> |                              |                       |                         |                  |
| <i>Citrobacter cronae</i>                         | Tue2-1 <sup>T</sup>          | VOSQ00000000          | Tue2-1 <sup>T</sup>     | MN548424         |
| <i>Citrobacter cronae</i>                         | Tue2-3                       | n/a                   | Tue2-3                  | n/a              |
| <i>Citrobacter cronae</i>                         | Tue2-5                       | n/a                   | Tue2-5                  | n/a              |
| <i>Citrobacter cronae</i>                         | Tue2-6                       | n/a                   | Tue2-6                  | n/a              |
| <i>Citrobacter cronae</i>                         | Tue2-7                       | n/a                   | Tue2-7                  | n/a              |
| <i>Citrobacter cronae</i>                         | Tue2-8                       | n/a                   | Tue2-8                  | n/a              |
| <i>Citrobacter cronae</i>                         | Tue2-9                       | n/a                   | Tue2-9                  | n/a              |
| <i>Citrobacter cronae</i>                         | Tue2-10                      | n/a                   | Tue2-10                 | n/a              |
| <i>Citrobacter cronae</i>                         | Tue2-11                      | n/a                   | Tue2-11                 | n/a              |

25

26 **Supplementary Table S2 (A and B): Percentage of average nucleotide identity (ANI) and calculation of digital DNA-DNA-hybridization**  
 27 **(dDDH) for the nine study isolates (S2A) and for *Citrobacter* type strains (S2B).**

28

29 **S2A**

| Strain | <i>Citrobacter</i> species           | 1   |      | 2     |      | 3     |      | 4     |      | 5     |      | 6     |      | 7     |      | 8     |      | 9     |      |
|--------|--------------------------------------|-----|------|-------|------|-------|------|-------|------|-------|------|-------|------|-------|------|-------|------|-------|------|
|        |                                      | ANI | dDDH | ANI   | dDDH | ANI   | dDDH | ANI   | dDDH | ANI   | dDDH | ANI   | dDDH | ANI   | dDDH | ANI   | dDDH | ANI   | dDDH |
| 1      | <i>C. cronae</i> Tue2_1 <sup>T</sup> | *   | *    | 99.96 | 99.8 | 99.97 | 100  | 99.67 | 98.6 | 99.67 | 98.3 | 99.97 | 99.9 | 99.97 | 100  | 99.97 | 99.8 | 99.97 | 100  |
| 2      | <i>C. cronae</i> Tue2_3              |     |      | *     | *    | 99.96 | 100  | 99.67 | 98.6 | 99.66 | 98.3 | 99.98 | 99.9 | 99.98 | 100  | 99.96 | 99.7 | 99.96 | 100  |
| 3      | <i>C. cronae</i> Tue2_5              |     |      |       |      | *     | *    | 99.78 | 99.5 | 99.78 | 99.2 | 99.98 | 99.9 | 99.98 | 99.9 | 99.97 | 99.6 | 99.97 | 100  |
| 4      | <i>C. cronae</i> Tue2_6              |     |      |       |      |       |      | *     | *    | 99.86 | 99.6 | 99.51 | 99.3 | 99.56 | 99.5 | 99.65 | 99.6 | 99.65 | 99.6 |
| 5      | <i>C. cronae</i> Tue2_7              |     |      |       |      |       |      |       |      | *     | *    | 99.46 | 99.1 | 99.5  | 99.3 | 99.59 | 99.4 | 99.57 | 99.3 |
| 6      | <i>C. cronae</i> Tue2_8              |     |      |       |      |       |      |       |      |       |      | *     | *    | 99.99 | 100  | 99.91 | 99.6 | 99.91 | 100  |
| 7      | <i>C. cronae</i> Tue2_9              |     |      |       |      |       |      |       |      |       |      |       |      | *     | *    | 99.91 | 99.7 | 99.91 | 100  |
| 8      | <i>C. cronae</i> Tue2_10             |     |      |       |      |       |      |       |      |       |      |       |      |       |      | *     | *    | 99.99 | 99.9 |
| 9      | <i>C. cronae</i> Tue2_11             |     |      |       |      |       |      |       |      |       |      |       |      |       |      |       |      | *     | *    |

30

31

32 **S2B**

| Strain | <i>Citrobacter</i> species                   | 1   |      | 2     |      | 3     |      | 4     |      | 5     |      | 6     |      | 7     |      | 8     |      | 9     |      | 10    |      | 11    |      | 12    |       | 13    |       | 14    |       | 15    |      |
|--------|----------------------------------------------|-----|------|-------|------|-------|------|-------|------|-------|------|-------|------|-------|------|-------|------|-------|------|-------|------|-------|------|-------|-------|-------|-------|-------|-------|-------|------|
|        |                                              | ANI | dDDH | ANI   | dDDH | ANI   | dDDH | ANI   | dDDH | ANI   | dDDH | ANI   | dDDH | ANI   | dDDH | ANI   | dDDH | ANI   | dDDH | ANI   | dDDH | ANI   | dDDH | ANI   | dDDH  | ANI   | dDDH  | ANI   | dDDH  | ANI   | dDDH |
| 1      | <i>C. cronae</i> Tue2_1 <sup>T</sup>         | *   | *    | 81.71 | 25.4 | 90.21 | 42.7 | 90.53 | 43   | 81.35 | 25   | 90.03 | 41.7 | 85.85 | 31.7 | 82.75 | 26.9 | 85.85 | 31.4 | 87.93 | 36.2 | 90.11 | 42.4 | 80.97 | 24.9  | 80.88 | 24.7  | 95.92 | 70    | 92.48 | 51.3 |
| 2      | <i>C. amalonaticus</i> NTC10505 <sup>T</sup> |     |      | *     | *    | 81.75 | 25.3 | 81.85 | 25.2 | 91.08 | 44.6 | 81.8  | 25.3 | 81.89 | 25.4 | 83.05 | 27   | 81.46 | 24.9 | 81.83 | 25.1 | 81.8  | 25.4 | 83.99 | 28.6  | 83.88 | 27.9  | 81.75 | 25.3  | 81.98 | 25.8 |
| 3      | <i>C. braakii</i> ATCC51113 <sup>T</sup>     |     |      |       |      | *     | *    | 92.57 | 52.9 | 81.5  | 25.1 | 91.87 | 48   | 85.98 | 31.7 | 82.77 | 26.9 | 86.05 | 31.6 | 88.86 | 38.8 | 91.64 | 48.5 | 80.86 | 24.8  | 80.95 | 24.5  | 90.35 | 42.8  | 90.31 | 43.1 |
| 4      | <i>C. europaeus</i> 97/79 <sup>T</sup>       |     |      |       |      |       |      | *     | *    | 81.27 | 25   | 91.92 | 49   | 85.68 | 31.6 | 82.76 | 26.9 | 85.87 | 31.6 | 88.76 | 38.5 | 91.92 | 50.3 | 80.81 | 24.7  | 80.66 | 24.6  | 90.45 | 43.4  | 90.2  | 42.9 |
| 5      | <i>C. fameri</i> GTC1319                     |     |      |       |      |       |      |       |      | *     | *    | 81.49 | 25.1 | 81.62 | 25.2 | 82.78 | 26.6 | 81.29 | 24.7 | 81.43 | 24.9 | 81.52 | 25.1 | 83.6  | 28    | 83.61 | 27.5  | 81.51 | 25.1  | 81.76 | 25.5 |
| 6      | <i>C. freundii</i> ATCC8090 <sup>T</sup>     |     |      |       |      |       |      |       |      |       |      | *     | *    | 86.08 | 31.7 | 82.79 | 26.6 | 86.08 | 31.4 | 89.66 | 40.3 | 94.16 | 58.4 | 81.11 | 24.8  | 81.05 | 24.5  | 90.33 | 41.9  | 90.12 | 41.6 |
| 7      | <i>C. gillenii</i> CIP106783 <sup>T</sup>    |     |      |       |      |       |      |       |      |       |      |       |      | *     | *    | 82.84 | 26.8 | 86.48 | 32.3 | 86.4  | 32   | 86.2  | 31.7 | 81.23 | 25    | 81.11 | 24.6  | 86.08 | 31.6  | 86.04 | 31.5 |
| 8      | <i>C. koseri</i> NCTC10786 <sup>T</sup>      |     |      |       |      |       |      |       |      |       |      |       |      |       |      | *     | *    | 82.81 | 26.4 | 82.92 | 26.4 | 83.14 | 26.8 | 82.7  | 26.9  | 82.51 | 26.1  | 83.01 | 26.9  | 83.27 | 27.2 |
| 9      | <i>C. murlinae</i> CIP104556 <sup>T</sup>    |     |      |       |      |       |      |       |      |       |      |       |      |       |      |       |      | *     | *    | 86.39 | 31.9 | 86    | 31.6 | 80.61 | 24.2  | 80.47 | 24    | 85.94 | 31.3  | 85.86 | 31.5 |
| 10     | <i>C. pasteurii</i> CIP55-13 <sup>T</sup>    |     |      |       |      |       |      |       |      |       |      |       |      |       |      |       |      | *     | *    | *     | *    | 88.86 | 38.4 | 81.03 | 24.7  | 80.97 | 24.5  | 88.31 | 36.3  | 88.29 | 36.5 |
| 11     | <i>C. portucalensis</i> A60 <sup>T</sup>     |     |      |       |      |       |      |       |      |       |      |       |      |       |      |       |      |       |      |       |      | *     | *    | 81.22 | 25    | 81.12 | 24.6  | 90.47 | 42.6  | 90.3  | 42.4 |
| 12     | <i>C. rodentium</i> NBRC105723 <sup>T</sup>  |     |      |       |      |       |      |       |      |       |      |       |      |       |      |       |      |       |      |       |      |       | *    | *     | 85.94 | 31.7  | 81.29 | 25.1  | 81.59 | 25.5  |      |
| 13     | <i>C. sedlakii</i> NBRC105722 <sup>T</sup>   |     |      |       |      |       |      |       |      |       |      |       |      |       |      |       |      |       |      |       |      |       |      |       | *     | *     | 81.07 | 24.7  | 81.45 | 25    |      |
| 14     | <i>C. werkmanii</i> NBRC105721 <sup>T</sup>  |     |      |       |      |       |      |       |      |       |      |       |      |       |      |       |      |       |      |       |      |       |      |       |       | *     | *     | 92.29 | 50.1  |       |      |
| 15     | <i>C. youngae</i> CCUG30791 <sup>T</sup>     |     |      |       |      |       |      |       |      |       |      |       |      |       |      |       |      |       |      |       |      |       |      |       |       |       | *     | *     |       |       |      |

33
